# Supplementary material
Source: Springer Nature journal article supplement (https://www.springermedizin.de/resource/supplementary/12865_2012_523_MOESM4_ESM.pdf/9428128)

Choose genes of interest by gene symbols

Retrieve house mouse cDNAs from Jackson lab informatics database

Batch BLAST house mouse cDNA against unannotated deer mouse genome trace archive

Assemble deer mouse exons and UTRs into virtual cDNAs

Pipe virtual cDNAs to Primer3 software with primer parameters

Primer3 software generates primer candidate list

Experimentally validate primer candidates

Conduct experimental infections

Identify active/repressed pathways by PCR array

Refine array with additional genes from pathway

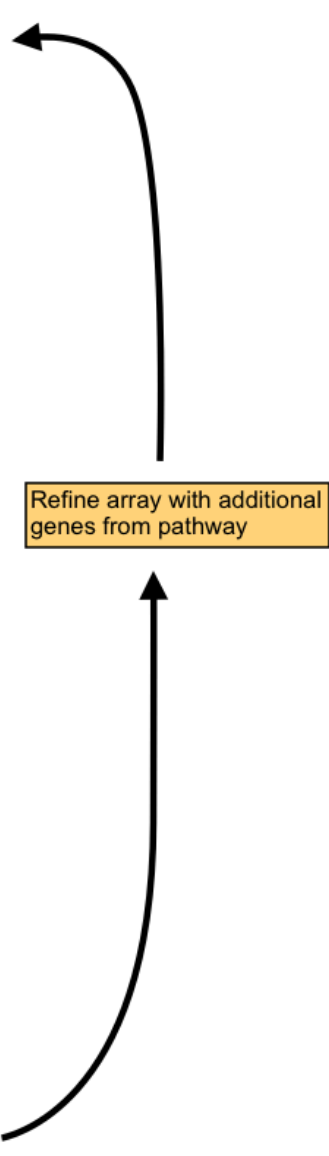

Supplement: MOESM4 [file 9428128]
